# Supplementary material for: Inhaled curcumin mesoporous polydopamine nanoparticles against radiation pneumonitis
Source: PubMed Central journal article supplement — Acta Pharm Sin B. 2021 Nov 5;12(5):2522–32. doi: 10.1016/j.apsb.2021.10.027 (PMC9136532; doi:10.1016/j.apsb.2021.10.027), 2021-11-05
Supplement: mmc1.pdf [file mmc1.pdf]

## Supporting Information for

ORIGINAL ARTICLE

### Inhaled curcumin mesoporous polydopamine nanoparticles against radiation pneumonitis

Ting Chen<sup>a,b,†</sup>, Bo Zhuang<sup>b,c,†</sup>, Yueqi Huang<sup>b</sup>, Yan Liu<sup>b</sup>, Bochuan Yuan<sup>b</sup>, Wanmei Wang<sup>b</sup>, Tianyu Yuan<sup>b</sup>, Lina Du<sup>a,b</sup>, Yiguang Jin<sup>a,b,\*</sup>

<sup>a</sup>*Guangdong Pharmaceutical University, Guangzhou 510006, China*

<sup>b</sup>*Department of Pharmaceutical Sciences, Beijing Institute of Radiation Medicine, Beijing 100850, China*

<sup>c</sup>*Department of Chemical Defense, Institute of NBC Defense, Beijing 102205, China*

Received 12 August 2021; received in revised form 20 October 2021; accepted 22 October 2021

\*Corresponding author.

E-mail address: jinyg@sina.com (Yiguang Jin).

†These authors made equal contributions to this work.

Running title: Inhaled curcumin mesoporous polydopamine nanoparticles against radiation pneumonitis

## Verification of MPDA chemical structure

The chemical structure of MPDA was identified with the Fourier Transform Infrared spectrometry (FTIR, Spectrum Two, PerkinElmer, USA). The FTIR spectrum (Fig. S1) of MPDA exhibits two bands at 1616 and 1510  $\text{cm}^{-1}$  (indicated by black arrows) attributed to the stretching vibration of C–C and C–N, respectively. The peak at 1354  $\text{cm}^{-1}$ , which appeared as a shoulder, is assigned to the stretching vibration of the indole ring. The FTIR results demonstrate the chemical structure of MPDA. Other studies also showed the similar results<sup>1</sup>.

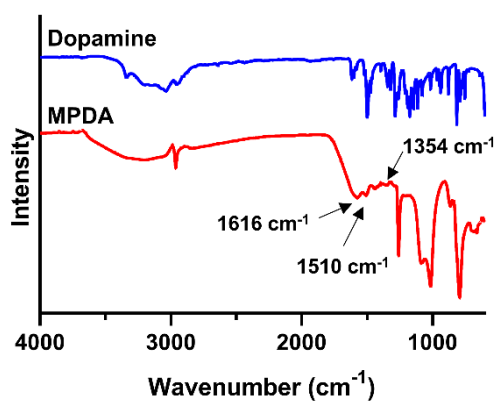

**Figure S1** FTIR spectra of dopamine and MPDA.

## Reference

1. Liu H, Qu X, Tan H, Song J, Lei M, Kim E, et al. Role of polydopamine's redox-activity on its pro-oxidant, radical-scavenging, and antimicrobial activities. *Acta Biomater* 2019;**88**:181-96.
